# Supplementary material for: Hydroxyl- and chloro-bridges as “structural assistants” in the construction of two new Keggin-based 3D frameworks
Source: Royal Society of Chemistry journal article supplement (doi:10.1039/c3ra41567h), 2013-01-01
Supplement: c3ra41567h.pdf [file c3ra41567h.pdf]

Supplementary Material (ESI) for RSC Advances  
This journal is © The Royal Society of Chemistry

## Structural assistants of hydroxyl- and chloro-bridges to construct two new 3D Keggin-based frameworks

AiXiang Tian, XiaoLing Lin, XiaoJing Liu, Jun Ying and XiuLi Wang\*

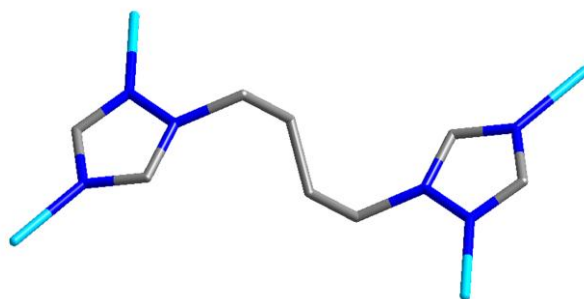

**Fig. S1.** The btb ligand donates four N atoms to coordinate with four  $\text{Cu}^{\text{I}}$  ions in compound **1**.

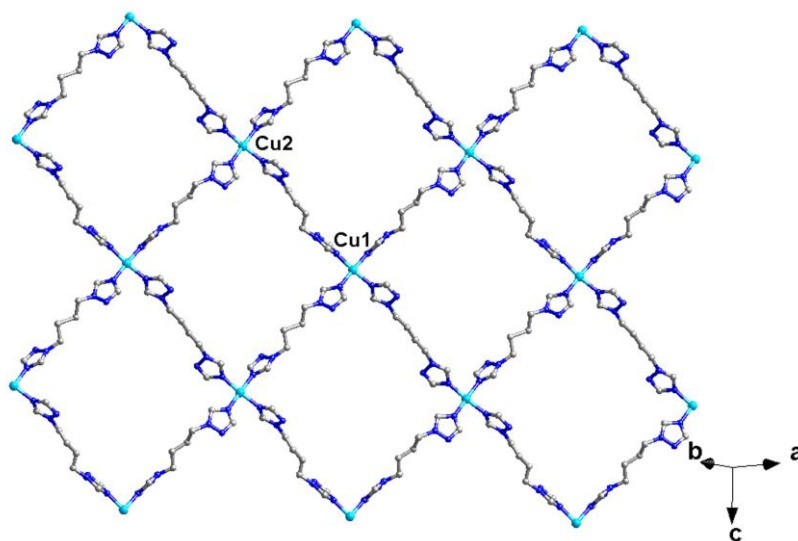

**Fig. S2.** The 2D metal-organic layer in compound **2** containing quadrangle tetra-nuclear  $\text{Cu}^{\text{II}}$  cycles.

**Supplementary Material (ESI) for RSC Advances**  
**This journal is © The Royal Society of Chemistry**

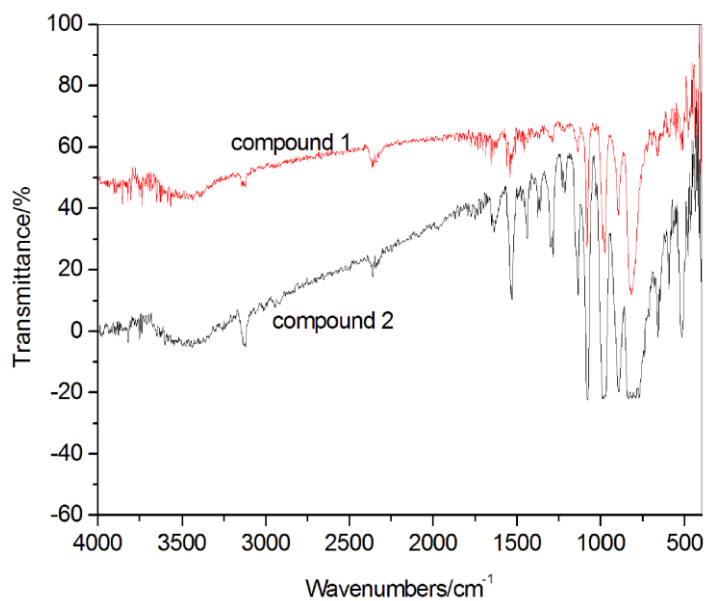

**Fig. S3.** IR spectra of compounds **1** and **2**.

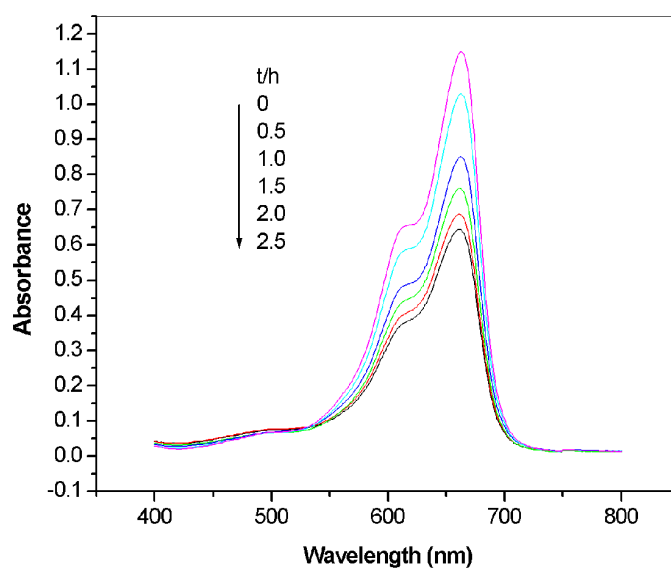

**Fig. S4** Absorption spectra of the MB solution during the decomposition reaction under UV light irradiation with the use of parent Keggin PW<sub>12</sub>.

**Supplementary Material (ESI) for RSC Advances**  
**This journal is © The Royal Society of Chemistry**

Table S1. Selected bond lengths (Å) and bond angles (°) for compounds **1** and **2**.

| Compound 1                                                                                                |           |                       |           |
|-----------------------------------------------------------------------------------------------------------|-----------|-----------------------|-----------|
| Cu(1)-N(1)#1                                                                                              | 1.878(11) | Cu(2)-N(2)#2          | 1.975(13) |
| Cu(2)-O(13)                                                                                               | 1.734(8)  | N(1)-Cu(1)-N(1)#1     | 168.7(8)  |
| N(2)-Cu(2)-O(13)                                                                                          | 112.2(4)  | N(2)-Cu(2)-N(2)#2     | 135.6(9)  |
| Cu(2)#3-O(13)-Cu(2)                                                                                       | 180       |                       |           |
| Symmetry codes for <b>1</b> : #1 -x,y,-z #2 -x,y,-z+1 #3 -x,-y+1,-z+1                                     |           |                       |           |
| Compound 2                                                                                                |           |                       |           |
| Cu(1)-N(4)                                                                                                | 2.010(17) | Cu(1)-N(10)           | 1.956(12) |
| Cu(1)-N(16)                                                                                               | 1.929(14) | Cu(1)-N(22)#4         | 1.999(18) |
| Cu(1)-O(26)                                                                                               | 2.647(17) | Cu(1)-Cl(1)           | 2.605(7)  |
| Cu(2)-N(1)                                                                                                | 2.032(19) | Cu(2)#1-N(9)          | 1.983(19) |
| Cu(2)#2-N(15)                                                                                             | 2.06(2)   | Cu(2)#3-N(21)         | 2.02(2)   |
| Cu(2)-O(44)#5                                                                                             | 2.589(17) | Cu(2)-Cl(1)           | 2.603(7)  |
| Cu(2)-Cl-Cu(1)                                                                                            | 177.7(3)  | N(10)-Cu(1)-N(16)     | 88.5(10)  |
| N(22)#4-Cu(1)-N(16)                                                                                       | 93.1(9)   | N(10)-Cu(1)-N(22)#4   | 175.9(9)  |
| N(4)-Cu(1)-N(16)                                                                                          | 172.1(10) | N(10)-Cu(1)-N(4)      | 88.2(9)   |
| N(22)#4-Cu(1)-N(4)                                                                                        | 89.7(7)   | N(16)-Cu(1)-Cl(1)     | 93.6(9)   |
| N(10)-Cu(1)-Cl(1)                                                                                         | 92.2(7)   | N(22)#4-Cu(1)-Cl(1)   | 91.4(6)   |
| N(9)#1-Cu(2)-N(21)#3                                                                                      | 173.4(8)  | N(9)#1-Cu(2)-N(1)     | 89.0(7)   |
| N(9)#1-Cu(2)-O(44)#5                                                                                      | 88.4(6)   | N(9)#1-Cu(2)-Cl(1)    | 93.6(5)   |
| O(44)#5-Cu(2)-Cl(1)                                                                                       | 175.5(4)  | N(1)-Cu(2)-Cl(1)      | 92.4(6)   |
| N(9)#1-Cu(2)-N(15)#2                                                                                      | 90.8(7)   | N(21)#3-Cu(2)-N(15)#2 | 89.9(7)   |
| Symmetry codes for <b>2</b> : #1 -x+1,-y,-z+1 #2 -x+1,-y,-z #3 -x,-y+1,-z #4 -x,-y+1,-z+1<br>#5 x-1,y-1,z |           |                       |           |
